# Supplementary material for: ATM and ATR Expression Potentiates HBV Replication and Contributes to Reactivation of HBV Infection upon DNA Damage
Source: MDPI journal article supplement (doi:10.3390/v11110997), 2019-10-31
Supplement: s1 [file s1]

# ATM and ATR Expression Potentiates HBV Replication and Contributes to Reactivation of HBV Infection upon DNA Damage

Kostyusheva A.<sup>1</sup>, Brezgin S.<sup>1,2</sup>, Bayurova E.<sup>3,4</sup>, Gordeychuk I.<sup>3,4,5</sup>, Isaguliants M.<sup>3,4,6,7</sup>, Goptar I.<sup>8</sup>, Urusov F.<sup>8</sup>, Nikiforova A.<sup>8</sup>, Volchkova E.<sup>5</sup>, Kostyushev D.<sup>1</sup> and Chulanov V.<sup>1,5,9</sup>

## Supplementary materials

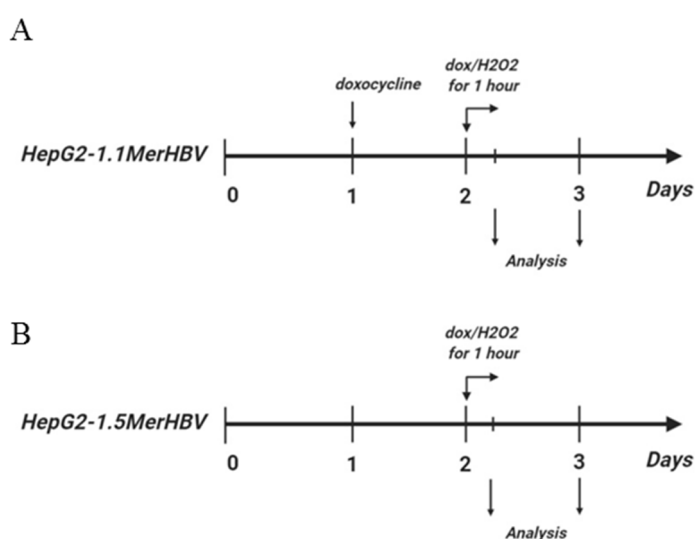

**Figure S1. Experimental schematics.** (A) HepG2-1.1merHBV were first treated with doxycycline for 24 h to induce HBV expression then incubated with doxorubicin or H<sub>2</sub>O<sub>2</sub> solutions for 1 h. Treated and untreated cells were harvested immediately or 24 h pt. (B) HepG2-1.5merHBV cells were treated by doxorubicin or H<sub>2</sub>O<sub>2</sub> solutions for 1 h and harvested immediately or 24 h pt.

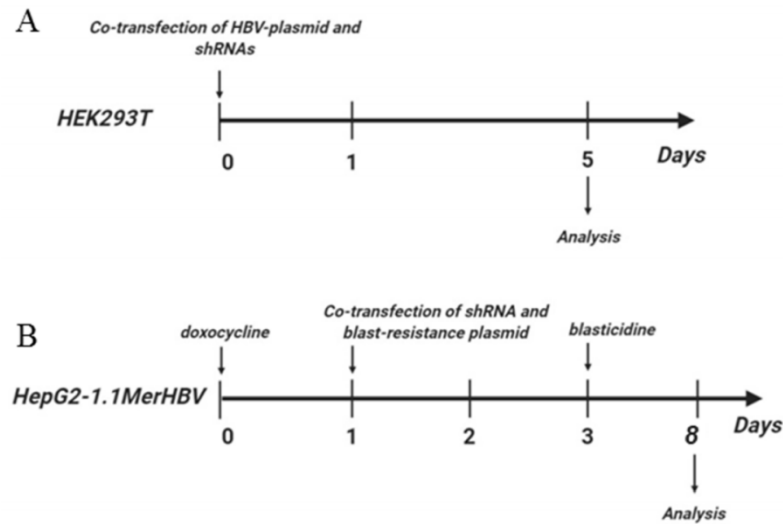

**Figure S2. Experimental schematic for shRNAs transfections.** (A) HEK293T cells were co-transfected with HBV-encoding plasmid and an shRNA-encoding plasmid using polyethylenimine; cells were harvested for analysis 5 days pt. (B) HepG2-1.1merHBV cells were treated by doxycycline for 24 h to induce HBV expression, co-transfected by shRNA-encoding plasmid and blasticidine-resistance plasmid the following day using Lipofectamine 3000. Transfected cells were selected with blasticidine for 5 days and harvested for analysis.

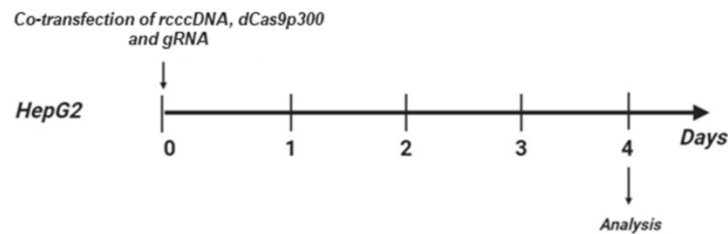

**Figure S3. Experimental schematic for transcriptional activation of ATM and ATR.** HepG2 cells were co-transfected by a recombinant cccDNA, dCas9p300 and a gRNA targeting either ATM or ATR promoter using Lipofectamine 3000 and harvested at day 4 pt.
